# Supplementary material
Source: Springer Nature journal article supplement (https://www.springermedizin.de/resource/supplementary/12961_2008_90_MOESM3_ESM.pdf/9571392)
Supplement: MOESM3 [file 9571392]

# *SPHERE*

Management

Literatures

Stakeholders

Bibliometric  
studies

Ministries  
PH associations

CSOs  
Researchers  
Institutions

Questionnaires  
-- priorities
